# Supplementary material
Source: PubMed Central journal article supplement (PMC9361781)
Supplement: NIHMS1816840-supplement-sup.pdf [file NIHMS1816840-supplement-sup.pdf]

## SUPPORTING INFORMATION

### **Role of cellular retinol-binding protein, type 1 and retinoid homeostasis in the adult mouse heart: a multi-omic approach**

Stephanie Zalesak-Kravec<sup>1+</sup>, Weiliang Huang<sup>1+</sup>, Jace W. Jones<sup>1+</sup>, Jianshi Yu<sup>1</sup>, Jenna Alloush<sup>1</sup>, Amy E. Defnet<sup>1</sup>, Alexander R. Moise<sup>2</sup>, Maureen A. Kane<sup>1\*</sup>

<sup>1</sup>University of Maryland, School of Pharmacy, Department of Pharmaceutical Sciences, Baltimore, MD;

<sup>2</sup>Medical Sciences Division, Northern Ontario School of Medicine, Sudbury, ON, Canada; Departments of Chemistry and Biochemistry, and Biology and Biomolecular Sciences Program, Laurentian University, Sudbury, ON, Canada.

+Co-first authors

\*Corresponding Author

Correspondence:  
Maureen A. Kane  
University of Maryland, School of Pharmacy  
Department of Pharmaceutical Sciences  
20 N. Pine Street, Room N731  
Baltimore, MD 21201  
Phone: (410) 706-5097  
Fax: (410) 706-0886  
Email: [makne@rx.umaryland.edu](mailto:makne@rx.umaryland.edu)



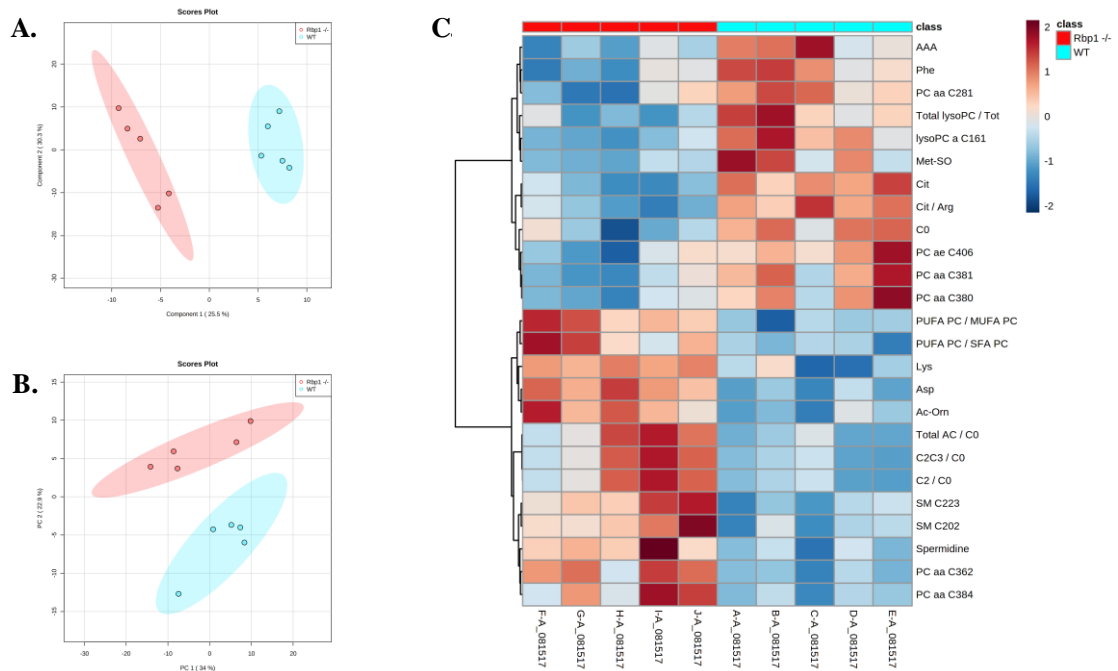

**Supplementary Figure 2. Multivariate analysis and hierarchical clustering displays statistical metabolite differences between atria for WT (cyan) and *Rbp1*<sup>-/-</sup> (red) mice.**

A. PLS-DA plot  $R^2=0.99$ .  $Q^2=0.91$ .  $N=5$  per group. Each point represents a data set from an individual animal tissue. The 95% confidence intervals are indicated by elliptical patterns per group.

B. PCA plot. PCA displayed a total of 56.9% variance, attributed to PC1 (34%) and PC2 (22.9%) components. The 95% confidence intervals are indicated by elliptical patterns per group.

C. Heatmap displaying the top 25 metabolites based on t-test/ANOVA, Euclidean distancing, and Ward clustering.

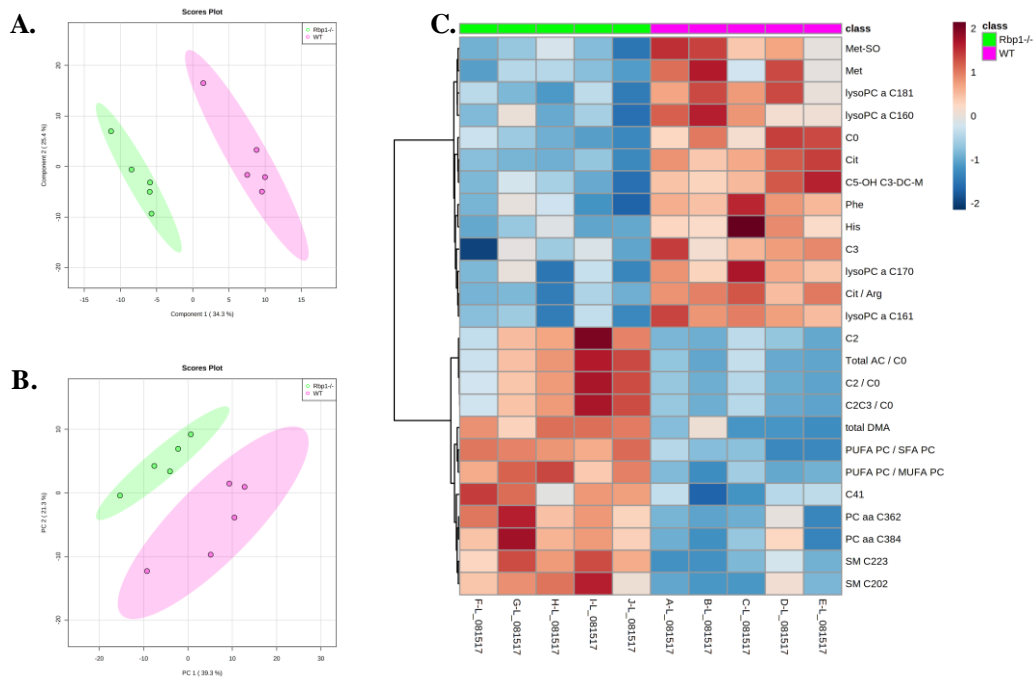

**Supplementary Figure 3. Multivariate analysis and hierarchical clustering displays statistical metabolite differences between Left Ventricle of WT (magenta) and *Rbp1*<sup>-/-</sup> (green) mice.**

A. PLS-DA plot  $R^2=0.99$ .  $Q^2=0.82$ .  $N=5$  per group. Each point represents a data set from an individual animal tissue. The 95% confidence intervals are indicated by elliptical patterns per group.

B. PCA plot. PCA displayed a total of 60.6% variance, attributed to PC1 (39.3%) and PC2 (21.3%) components. The 95% confidence intervals are indicated by elliptical patterns per group.

C. Heatmap displaying the top 25 metabolites based on t-test/ANOVA, Euclidean distancing, and Ward clustering.

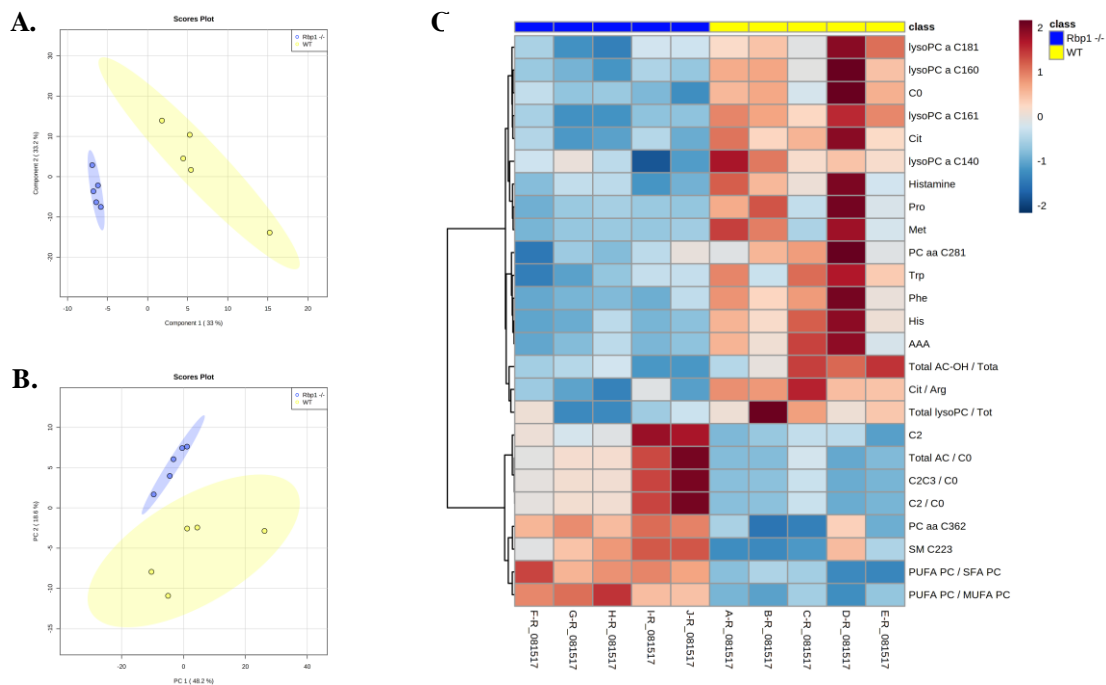

**Supplementary Figure 4. Multivariate analysis and hierarchical clustering displays statistical metabolite differences between Right Ventricle (RV) for WT (blue) and *Rbp1*<sup>-/-</sup> (yellow) mice.**

A. PLS-DA plot  $R^2=0.99$ ,  $Q^2=0.83$ ,  $N=5$  per group. Each point represents a data set from an individual animal tissue. The 95% confidence intervals are indicated by elliptical patterns per group.

B. PCA plot. PCA displayed a total of 66.8% variance, attributed to PC1 (48.2%) and PC2 (18.6%) components. The 95% confidence intervals are indicated by elliptical patterns per group.

C. Heatmap displaying the top 25 metabolites based on t-test/ANOVA, Euclidean distancing, and Ward clustering.

A.

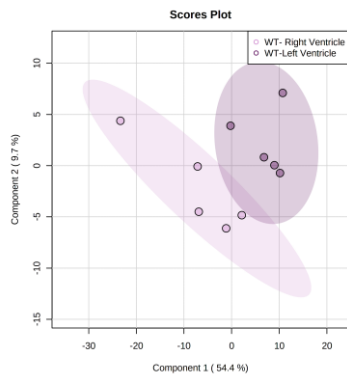

B.

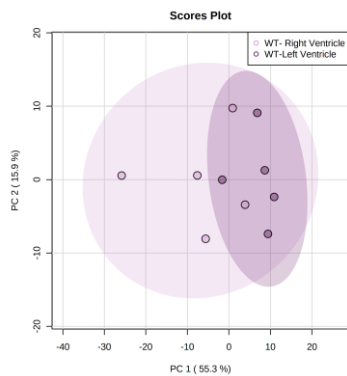

C.

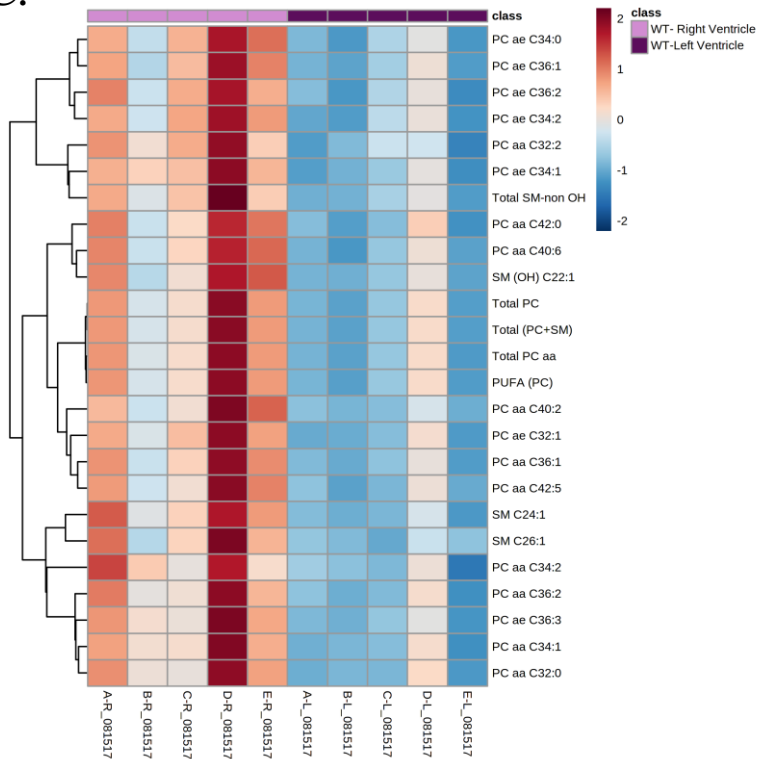

**Supplemental Figure 5. Multivariate analysis and hierarchical clustering displays metabolite differences between WT LV (dark purple) and RV (light purple).**

A. PLS-DA plot  $R^2=0.53$ .  $Q^2=0.07$ .  $N=5$  per group. Each point represents a data set from an individual animal tissue. The 95% confidence intervals are indicated by elliptical patterns per group.

B. PCA plot. PCA displayed a total of 71.2% variance, attributed to PC1 (55.3%) and PC2 (15.9%) components. The 95% confidence intervals are indicated by elliptical patterns per group.

C. Heatmap displaying the top 25 metabolites based on t-test/ANOVA, Euclidean distancing, and Ward clustering.

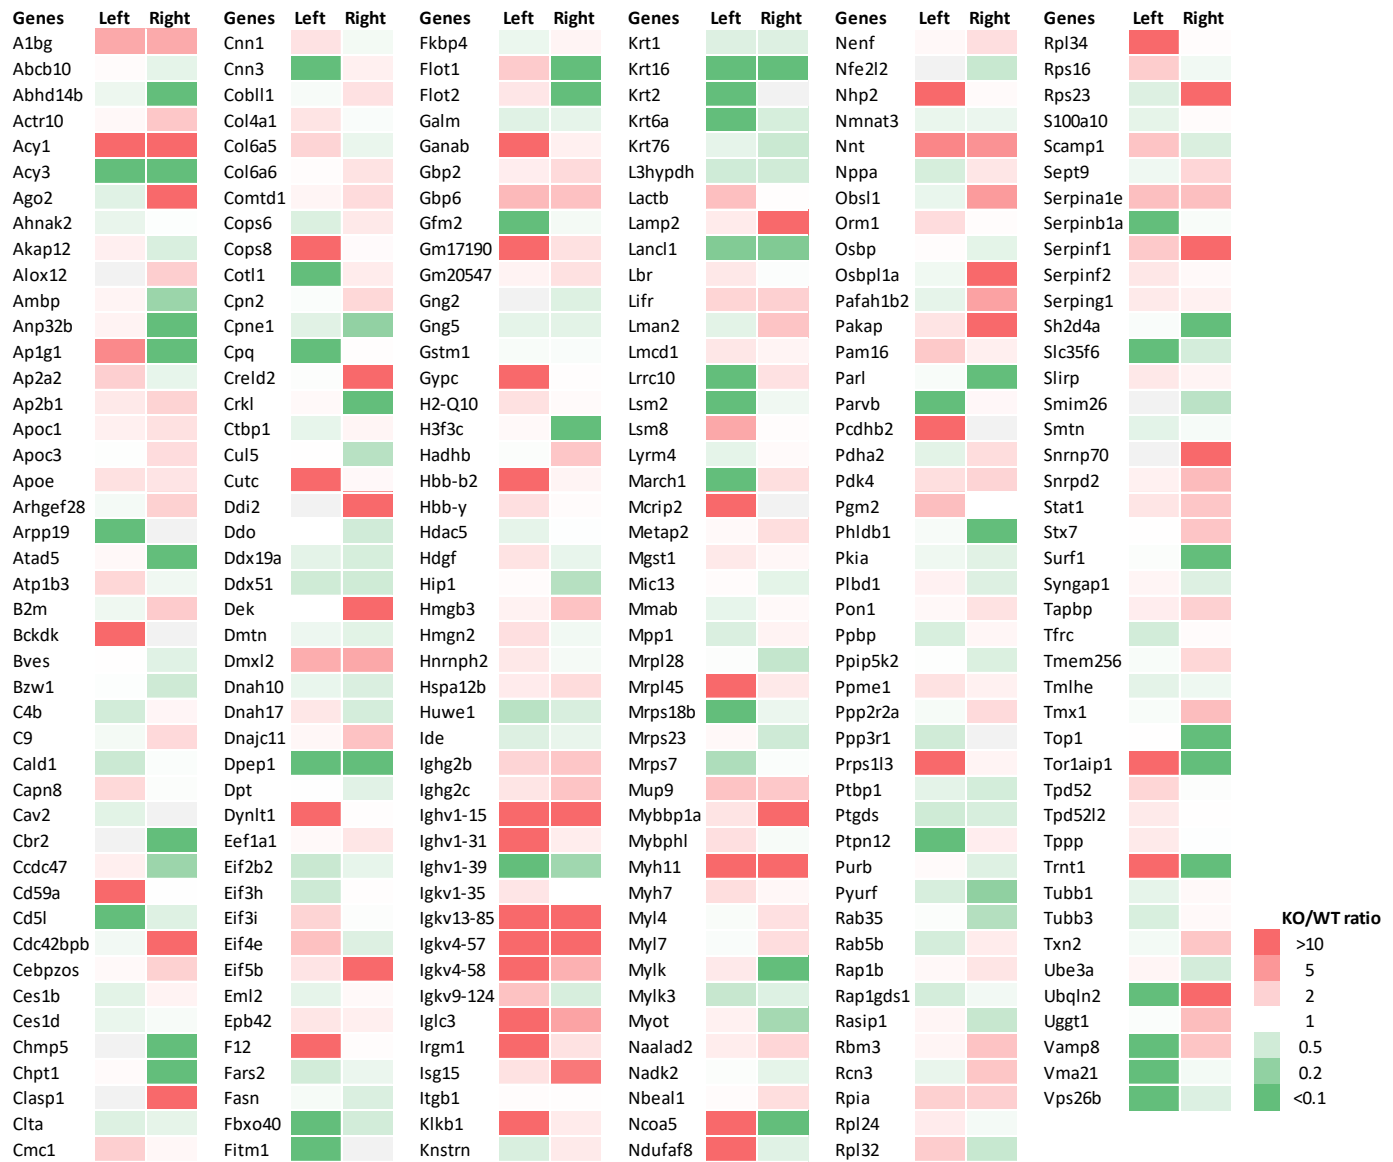

**Supplementary Figure 6. Expression of proteins most changed in either left or right ventricles of *Rbp1*<sup>-/-</sup> mice compared to WT mice. Minimum 2-fold change of expression and FDR adjusted p-value <0.05 were criteria for inclusion.**

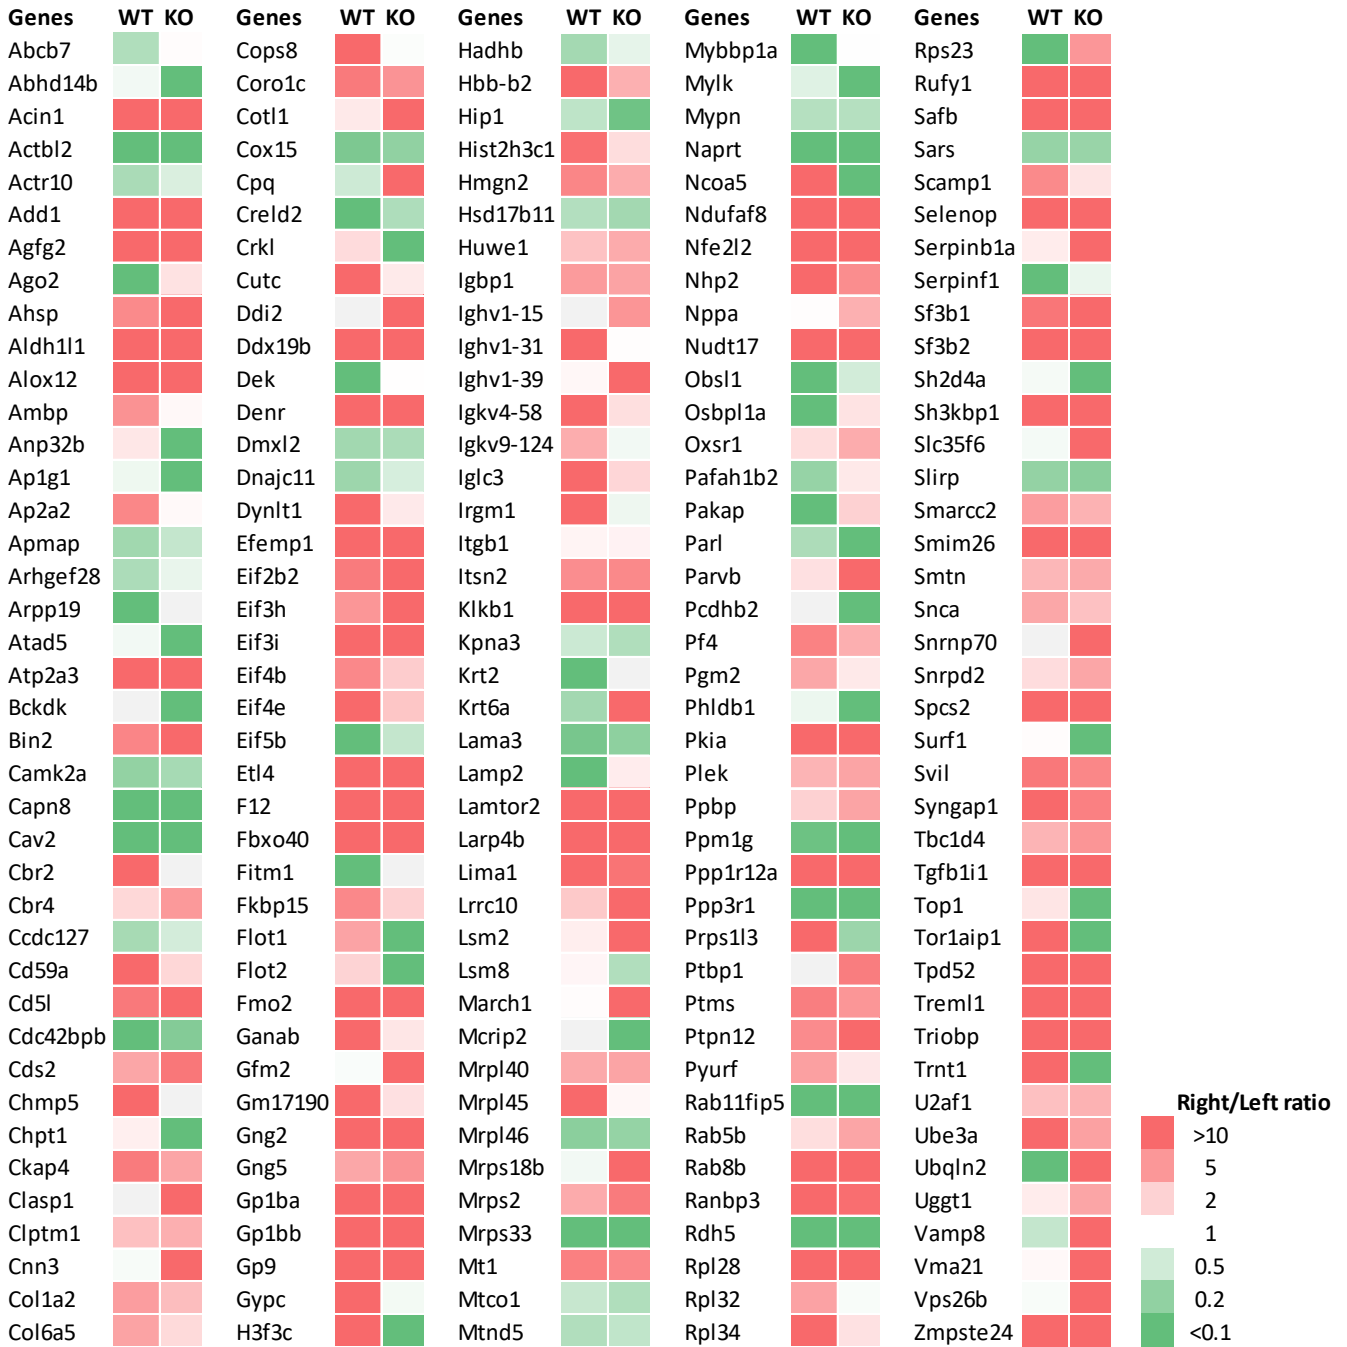

**Supplementary Figure 7. Expression of proteins most changed in left vs. right ventricle in either *Rbp1*<sup>-/-</sup> or WT mice.** Minimum 2-fold change of expression and FDR adjusted p-value <0.05 were criteria for inclusion.
